# Supplementary material for: Contact X-ray Brachytherapy for Older or Inoperable Rectal Cancer Patients: Short-Term Oncological and Functional Follow-Up
Source: MDPI journal article supplement (doi:10.3390/cancers13246333), 2021-12-16
Supplement: s1 [file s1]

## Supplementary Materials

**Table S1.** Questionnaire in-depth interview.

| Experience of patients treated with contact x-ray brachytherapy                                                                                                                                                                                                                                                                                                                                                                                                                                                                                                                                                                                                                                                                                                                                                                                                                                                                                                                                                                                                                                                                                               |
|---------------------------------------------------------------------------------------------------------------------------------------------------------------------------------------------------------------------------------------------------------------------------------------------------------------------------------------------------------------------------------------------------------------------------------------------------------------------------------------------------------------------------------------------------------------------------------------------------------------------------------------------------------------------------------------------------------------------------------------------------------------------------------------------------------------------------------------------------------------------------------------------------------------------------------------------------------------------------------------------------------------------------------------------------------------------------------------------------------------------------------------------------------------|
| <p>Theme 1: Prior to treatment with contact x-ray brachytherapy</p> <ul style="list-style-type: none"> <li>- How were you informed about the treatment? Did you miss any information about the treatment? Would you prefer to get informed in a different way?</li> <li>- Did you get enough information about possible alternative treatments?</li> <li>- Did you have enough time to make the medical decision with your physician?</li> </ul>                                                                                                                                                                                                                                                                                                                                                                                                                                                                                                                                                                                                                                                                                                              |
| <p>Theme 2: Treatment with contact x-ray brachytherapy</p> <ul style="list-style-type: none"> <li>- Was the intent of the treatment clearly explained to you?</li> <li>- How did you experience the treatment?</li> <li>- Was the treatment as you expected, based on the information you got prior to the treatment?</li> <li>- How did you experience the personal care during the treatment?</li> </ul>                                                                                                                                                                                                                                                                                                                                                                                                                                                                                                                                                                                                                                                                                                                                                    |
| <p>Theme 3: The result after treatment with contact x-ray brachytherapy?</p> <ul style="list-style-type: none"> <li>- What was the result you expected to achieve after the treatment with contact x-ray brachytherapy?</li> <li>- How satisfied are you with the result?</li> <li>- Did you experience any complaints or side-effects during or after treatment with contact x-ray brachytherapy? If yes, which complaints or side-effects?</li> <li>- Where those complaints or side-effects discussed with you prior to the treatment?</li> <li>- Where those complaints or side-effects as you expected?</li> <li>- How do you experience your quality of life at this moment after treatment with contact x-ray brachytherapy?</li> <li>- How is your quality of life compared to your quality of life before treatment with contact x-ray brachytherapy?</li> <li>- Is the quality of life at this moment as you expected it to be, based on the discussion with your physician prior to treatment with contact x-ray brachytherapy?</li> <li>- Can you handle the uncertainty or stress accompanied with the follow-up investigations well?</li> </ul> |
| <p>Theme 4: Conclusion</p> <ul style="list-style-type: none"> <li>- If you have to evaluate everything, so the treatment itself, the first period after the treatment, possible side-effects, and the result of the treatment, did you all expect this?</li> <li>- Would you choose a second time for the treatment with contact x-ray brachytherapy? Would you recommend the treatment to family or friends?</li> <li>- On a scale of 1 to 10, how satisfied are you with the treatment?</li> <li>- On a scale of 1 to 10, how satisfied are you with the result of the treatment?</li> <li>- On a scale of 1 to 10, how satisfied are you with you quality of life at this moment?</li> </ul>                                                                                                                                                                                                                                                                                                                                                                                                                                                               |

**Table S2.** Subthemes and example quotes in-depth interview.

| Subtheme                                                          | N=14<br>(100%) | Example quotes                                                                                                                 |
|-------------------------------------------------------------------|----------------|--------------------------------------------------------------------------------------------------------------------------------|
| Experiences with treatment                                        |                |                                                                                                                                |
| Discomfort                                                        | 8              | "It is not pleasant, though not painful, it has to be done anyway" (patient 12)                                                |
| Painful                                                           | 6              | "I did have terrible pain, (...), but as soon as the applicator was out of my body it was okay for me" (patient 3)             |
| Expectations regarding treatment with contact x-ray brachytherapy |                |                                                                                                                                |
| Like expected                                                     | 8              | "The doctors established a realistic expectation pattern before start of the treatment" (patient 11)                           |
| Expected otherwise                                                | 3              | "I did not expect it to be so painful" (patient 3)                                                                             |
| Treatment response                                                |                |                                                                                                                                |
| Satisfied                                                         | 11             | "I'm satisfied, I'm happy that it all went well" (patient 12)                                                                  |
| Disappointed                                                      | 2              | Eventually, the expectations I had of the treatment were higher than what I got, but that's the way it is" (patient 6)         |
| Follow-up                                                         |                |                                                                                                                                |
| Stressful                                                         | 7              | "Every follow-up moment, I certainly do experience some anxiety, but it is not a heavy burden for me" (patient 10)             |
| Not stressful                                                     | 6              | "I don't think it is stressful at all, to be honest, I think it [the follow-up appointment] is quite interesting" (patient 11) |
| Side-effects                                                      |                |                                                                                                                                |
| Present                                                           | 10             | "I did experience some blood loss after the treatment" (patient 13)                                                            |
| Not present                                                       | 4              | "I did not experience any side-effects" (patient 16)                                                                           |
| Quality of life                                                   |                |                                                                                                                                |
| Good quality of life                                              | 13             | "My quality of life is fine, I don't experience any side-effects, but I never have" (patient 10)                               |
| Poor quality of life                                              | 1              | "Well, I will not say it is 0.0, but my quality of life is not so good, especially due to my incontinence" (patient 3)         |
| Patients' reflections on the treatment                            |                |                                                                                                                                |
| Positive                                                          | 14             | "I would do it again right away" (patient 9)                                                                                   |
